# Supplementary material
Source: ML conference proceedings conference paper supplement (https://openaccess.thecvf.com/content/CVPR2026/html/Zang_Test-Time_Perturbation_Tuning_CVPR_2026_paper.html)
Supplement: Supplementary file 1 [file Zang_Test-Time_Perturbation_Tuning_CVPR_2026_supplemental.pdf]

# Test-Time Perturbation Tuning with Delayed Feedback for Vision-Language-Action Models

## Supplementary Material

### 6. Psydo-Code

We provide a brief overview of the training pipeline outlined in Algorithm 1, which implements PDF.

---

**Algorithm 1** Perturbation Learning with Delayed Feedback (PDF)

---

**Require:** Pretrained VLA parameters  $\phi$  (frozen); Perturbation head parameters  $\theta$  (trainable); maximum augmentation budget  $N_{\max}$ ; buffer  $\mathcal{D}$ .

- 1: **for** each episode **do**
- 2:   **for** each timestep  $t$  **do**
- 3:     Observe current state  $s_t = (o_t, c_t)$
- 4:     Embed  $o_t$  and  $c_t$  to obtain multimodal feature  $f_t$
- 5:     Compute logits  $z_t = h_\phi(f_t)$
- 6:     Estimate uncertainty by Equation 1
- 7:     Determine augmentation budget  $N_t = N_{\max} \cdot \mathcal{U}_t$
- 8:     Generate augmented views  $\{T_j(o_t)\}_{j=1}^{N_t}$
- 9:     **for** each view  $T_j(o_t)$  **do**
- 10:       Encode to feature  $f_{t,j}$
- 11:       Compute perturbed logits by Equation 3
- 12:     **end for**
- 13:     Select final action  $a_t$  by majority voting over  $\tilde{z}_{t,j}$
- 14:     Interact with environment using  $a_t$
- 15:     Store  $\{f_{t,j}\}$  in buffer  $\mathcal{D}$
- 16:   **end for**
- 17:   Receive delayed feedback  $r$  after episode
- 18:   Sample batch of features  $f_b$  from  $\mathcal{D}$
- 19:   Compute perturbed logits  $\tilde{z}_b = h_\phi(f_b) + h_\theta(f_b)$
- 20:   Generate policy  $\tilde{\pi}_b = \text{softmax}(\tilde{z}_b)$
- 21:   Compute PDF loss by Equation 5
- 22:   Update perturbation head  $\theta \leftarrow \theta - \eta \nabla_\theta \mathcal{L}_{\text{PDF}}$
- 23: **end for**

---

### 7. Additional Experiments Results on Atari 57

Table 4 presents the detailed results of PDF and JAT on the full Atari 57 benchmark.

| Games              | ID | JAT (Raw Score)    | JAT (Human Normalized Score) | PDF (Raw Score)   | PDF (Human Normalized Score) |
|--------------------|----|--------------------|------------------------------|-------------------|------------------------------|
| ALIEN              | 22 | 1427.9 ± 540.28    | 0.17                         | 2034.4 ± 560.47   | 0.26                         |
| AMIDAR             | 34 | 105 ± 76.93        | 0.06                         | 150.2 ± 57.05     | 0.08                         |
| ASSAULT            | 4  | 1627.57 ± 799.09   | 2.7                          | 1861 ± 742.69     | 3.15                         |
| ASTERIX            | 51 | 861.5 ± 517.97     | 0.08                         | 700 ± 361.25      | 0.06                         |
| ASTEROIDS          | 42 | 1362 ± 461.03      | 0.01                         | 1405 ± 241.92     | 0.01                         |
| ATLANTIS           | 3  | 47047 ± 102148.27  | 2.11                         | 54950 ± 12497.3   | 2.6                          |
| BANKHEIST          | 38 | 972.6 ± 139.62     | 1.3                          | 976 ± 109.01      | 1.3                          |
| BATTLEZONE         | 57 | 17660 ± 6516.47    | 0.47                         | 13700 ± 5348.83   | 0.36                         |
| BEAMRIDER          | 48 | 757.76 ± 297.41    | 0.02                         | 704.4 ± 250.38    | 0.02                         |
| BERZERK            | 23 | 692.3 ± 337.1      | 0.23                         | 910 ± 160.93      | 0.31                         |
| BOWLING            | 37 | 22.48 ± 5.71       | 0                            | 24.1 ± 5.72       | 0.01                         |
| BOXING             | 1  | 92.77 ± 12.05      | 7.72                         | 100 ± 22.36       | 8.33                         |
| BREAKOUT           | 52 | 8.77 ± 5.81        | 0.25                         | 8.2 ± 4.53        | 0.23                         |
| CENTIPEDE          | 24 | 5807.4 ± 2289.32   | 0.37                         | 6599.8 ± 3203.28  | 0.45                         |
| CHOPPERCOMMAND     | 10 | 2448 ± 1351.18     | 0.25                         | 3820 ± 1116.06    | 0.46                         |
| CRAZYCLIMBER       | 11 | 100385 ± 23988.53  | 3.58                         | 104930 ± 23118.83 | 3.76                         |
| DEFENDER           | 6  | 38731 ± 13137.38   | 2.27                         | 44910 ± 19215.64  | 2.66                         |
| DEMONATTACK        | 17 | 817.2 ± 1218.2     | 0.37                         | 1031 ± 268.88     | 0.48                         |
| DOUBLEDUNK         | 28 | 15.88 ± 8.9        | 0.99                         | 17.6 ± 8.49       | 1.03                         |
| ENDURO             | 49 | 109.9 ± 27.42      | 0.13                         | 104.4 ± 23.25     | 0.12                         |
| FISHINGDERBY       | 50 | -28.9 ± 23.1       | 0.48                         | -30 ± 14.18       | 0.47                         |
| FREEWAY            | 18 | 27.37 ± 1.85       | 0.92                         | 30.8 ± 1.47       | 1.04                         |
| FROSTBITE          | 9  | 2818.1 ± 1637.63   | 0.64                         | 3785 ± 861.11     | 0.87                         |
| GOPHER             | 16 | 5996.6 ± 2928.52   | 2.66                         | 6302 ± 3369.31    | 2.8                          |
| GRAVITAR           | 47 | 1340.5 ± 890.97    | 0.37                         | 1340 ± 912.63     | 0.37                         |
| H.E.R.O.           | 29 | 12735.4 ± 3712.12  | 0.39                         | 14048.5 ± 2446.9  | 0.44                         |
| ICEHOCKEY          | 5  | 7.21 ± 5.23        | 1.52                         | 12.5 ± 5.78       | 1.96                         |
| JAMESBOND          | 55 | 370.5 ± 242.08     | 1.25                         | 360 ± 106.77      | 1.21                         |
| KANGAROO           | 35 | 441 ± 353.01       | 0.13                         | 500 ± 223.61      | 0.15                         |
| KRULL              | 8  | 10618.1 ± 1301.69  | 8.45                         | 10957 ± 1389.92   | 8.77                         |
| KUNG-FUMASTER      | 43 | 255 ± 209.46       | 0                            | 270 ± 195.19      | 0                            |
| MONTEZUMA'SREVENGE | 44 | 0 ± 0              | 0                            | 0 ± 0             | 0                            |
| MS.PACMAN          | 12 | 1538.8 ± 391.43    | 0.19                         | 2609 ± 525.12     | 0.35                         |
| NAMETHISGAME       | 7  | 7679 ± 2462        | 0.94                         | 9665 ± 2009.26    | 1.28                         |
| PHOENIX            | 20 | 1963.9 ± 1487.39   | 0.19                         | 2548 ± 2296.47    | 0.28                         |
| PITFALL            | 40 | -25.24 ± 199.07    | 0.03                         | -3.5 ± 8.96       | 0.03                         |
| PONG               | 15 | 13.32 ± 13.31      | 0.96                         | 18.4 ± 7.8        | 1.11                         |
| PRIVATEEYE         | 46 | 42 ± 49.36         | 0                            | 40 ± 48.99        | 0                            |
| Q*BERT             | 21 | 2190.75 ± 2789.24  | 0.15                         | 3387.5 ± 3334.39  | 0.24                         |
| RIVERRAID          | 31 | 3780.1 ± 1494.42   | 0.15                         | 4311 ± 2066.83    | 0.19                         |
| ROADRUNNER         | 26 | 5409 ± 4063.84     | 0.69                         | 5930 ± 6188.06    | 0.76                         |
| ROBOTANK           | 19 | 9.8 ± 4.29         | 0.78                         | 10.7 ± 4.54       | 0.88                         |
| SEAQUEST           | 39 | 856.2 ± 345.1      | 0.02                         | 1002 ± 302.85     | 0.02                         |
| SKIING             | 25 | -17007.41 ± 6176.5 | 0.01                         | -16110.9 ± 6255.6 | 0.08                         |
| SOLARIS            | 54 | 1300.4 ± 434.15    | 0.01                         | 1024 ± 360.98     | -0.02                        |
| SPACEINVADERS      | 32 | 352.95 ± 198.67    | 0.13                         | 396 ± 141.93      | 0.16                         |
| STARGUNNER         | 30 | 4698 ± 3102.48     | 0.42                         | 5100 ± 4481.52    | 0.46                         |
| SURROUND           | 53 | 3.57 ± 4.2         | 0.82                         | 3.2 ± 3.82        | 0.8                          |
| TENNIS             | 56 | -11.9 ± 4.57       | 0.37                         | -13.3 ± 5.06      | 0.33                         |
| TIMEPILOT          | 2  | 11830 ± 4266.79    | 4.97                         | 12710 ± 4073.68   | 5.5                          |
| TUTANKHAM          | 14 | 110.42 ± 65.31     | 0.63                         | 133.1 ± 59.05     | 0.78                         |
| UPANDDOWN          | 13 | 19616.9 ± 10519.15 | 1.71                         | 21370 ± 6814.47   | 1.87                         |
| VENTURE            | 45 | 0 ± 0              | 0                            | 0 ± 0             | 0                            |
| VIDEOPINBALL       | 33 | 12522.37 ± 9866.3  | 0.71                         | 13017.3 ± 4473.44 | 0.74                         |
| WIZARDOFWOR        | 27 | 2228 ± 2246.38     | 0.4                          | 2470 ± 2106.68    | 0.45                         |
| YARSREVENGE        | 36 | 11192.57 ± 6595.92 | 0.16                         | 12064.7 ± 8045.11 | 0.17                         |
| ZAXXON             | 41 | 7033 ± 3261.04     | 0.77                         | 7060 ± 2196       | 0.77                         |
| Average            | -  | -                  | 0.97                         | -                 | 1.07                         |

Table 4. Performance evaluations on 57 Atari games.
